# Supplementary material for: Decreased Clinical Severity of Pediatric Acute COVID-19 and MIS-C and Increase of Incidental Cases during the Omicron Wave in Comparison to the Delta Wave
Source: MDPI journal article supplement (doi:10.3390/v15010180), 2023-01-07
Supplement: s1 [file s1]

## Supplementary Data:

Supplementary Table S1: Symptoms and systems reported by patients and noted in chart as abnormal in patients admitted with acute COVID-19 (PCR-positive) during the Delta and Omicron waves. P-values comparing total prevalence to evaluate for statistically significant differences between the waves are also shown.

| Symptom               | Delta       |                 |       | Omicron     |                 |       | p-values |
|-----------------------|-------------|-----------------|-------|-------------|-----------------|-------|----------|
|                       | Respiratory | Non-respiratory | Total | Respiratory | Non-respiratory | Total |          |
| Fever                 | 24          | 19              | 43    | 48          | 37              | 85    | 0.1847   |
| Conjunctivitis        | 1           | 3               | 4     | 1           | 3               | 4     | 0.4701   |
| Rash                  | 0           | 1               | 1     | 4           | 9               | 13    | 0.0189   |
| Extremity changes     | 0           | 1               | 1     | 0           | 1               | 1     | >0.9999  |
| Adenopathy            | 1           | 1               | 2     | 1           | 4               | 5     | >0.9999  |
| Mucositis             | 0           | 0               | 0     | 0           | 4               | 4     | 0.2983   |
| Cough                 | 35          | 14              | 49    | 56          | 11              | 67    | 0.0588   |
| Sore throat           | 13          | 3               | 16    | 5           | 4               | 9     | 0.0036   |
| Congestion/Rhinorrhea | 32          | 14              | 46    | 44          | 18              | 62    | 0.0644   |
| Abdominal Pain        | 8           | 8               | 16    | 2           | 6               | 8     | 0.0025   |
| Diarrhea              | 12          | 4               | 16    | 3           | 15              | 18    | 0.2373   |
| Vomiting              | 14          | 16              | 30    | 18          | 22              | 40    | 0.2109   |
| Arthritis             | 3           | 0               | 3     | 0           | 2               | 2     | 0.3603   |
| Myalgia               | 8           | 4               | 12    | 1           | 7               | 8     | 0.0288   |
| Chills                | 6           | 4               | 10    | 6           | 2               | 8     | 0.1213   |
| SOB/inc WOB           | 34          | 3               | 37    | 44          | 0               | 44    | 0.0325   |
| anosmia               | 2           | 2               | 4     | 1           | 1               | 2     | 0.1958   |
| Headache              | 4           | 5               | 9     | 1           | 2               | 3     | 0.0099   |
| AMS                   | 0           | 2               | 2     | 2           | 2               | 4     | >0.9999  |
| Syncope               | 0           | 1               | 1     | 0           | 1               | 1     | >0.9999  |
| Shock (pressors)      | 1           | 2               | 3     | 2           | 2               | 4     | 0.7105   |
| Derm NOS              | 3           | 2               | 5     | 5           | 8               | 13    | 0.4521   |
| GI -NOS               | 2           | 6               | 8     | 3           | 2               | 5     | 0.0744   |
| Respiratory -NOS      | 3           | 0               | 3     | 11          | 1               | 12    | 0.2633   |
| CNS-NOS               | 1           | 5               | 6     | 7           | 14              | 21    | 0.1295   |
| Renal                 | 0           | 2               | 2     | 0           | 4               | 4     | >0.9999  |
| Cardiovascular - NOS  | 1           | 2               | 3     | 4           | 2               | 6     | >0.9999  |
| Hematologic           | 0           | 2               | 2     | 6           | 9               | 15    | 0.0325   |

Supplementary Table S2: Symptoms and select findings reported by patients and select findings in those admitted with MIS-C temporally associated with the Delta and Omicron waves. (NOS: not otherwise specified; symptoms not easily categorized)

|                              | Delta   | Omicron   | p-value |
|------------------------------|---------|-----------|---------|
| Conjunctivitis               | 4 (36%) | 5 (50%)   | 0.563   |
| Rash                         | 4 (36%) | 6 (60%)   | 0.324   |
| Adenopathy                   | 2 (18%) | 4 (40%)   | 0.296   |
| mucositis                    | 1 (9%)  | 4 (40%)   | 0.112   |
| Cough                        | 1 (9%)  | 6 (60%)   | 0.020   |
| Sore throat                  | 4 (36%) | 3 (30%)   | 0.773   |
| Congestion/Rhinorrhea        | 3 (27%) | 3 (30%)   | 0.896   |
| Abdominal Pain               | 4 (36%) | 6 (60%)   | 0.324   |
| Diarrhea                     | 3 (27%) | 6 (60%)   | 0.164   |
| Vomiting                     | 4 (36%) | 9 (90%)   | 0.023   |
| Myalgia                      | 0 (0%)  | 3 (30%)   | 0.056   |
| SOB                          | 2 (18%) | 1 (10%)   | 0.603   |
| Headache                     | 4 (36%) | 2 (20%)   | 0.434   |
| Shock (pressor requirement)  | 4 (36%) | 0 (0%)    | 0.042   |
| GI -NOS                      | 1 (9%)  | 3 (30%)   | 0.240   |
| CNS-NOS                      | 0 (0%)  | 2 (20%)   | 0.126   |
| CV - NOS or labs             | 7 (64%) | 6 (60%)   | 0.881   |
| Hematologic                  | 7 (64%) | 10 (100%) | 0.058   |
| Respiratory support          | 4 (36%) | 1 (10%)   | 0.177   |
| CXR abnormal                 | 5 (45%) | 2 (20%)   | 0.249   |
| Left ventricular dysfunction | 6 (55%) | 2 (20%)   | 0.134   |

Supplementary Table S3: Values used for calculation of vaccine efficacy, expanded

|                                  | Vaccinated                              | Unvaccinated remainder                | Total patients | % Vaccinated | % Unvaccinated |
|----------------------------------|-----------------------------------------|---------------------------------------|----------------|--------------|----------------|
| Fully vaccinated calculation     | 5                                       | 83                                    | 88             | 5.7%         | 94.3%          |
| Calculation with any vaccination | 6                                       | 82                                    | 88             | 6.8%         | 93.2%          |
|                                  |                                         |                                       |                |              |                |
|                                  | January, vaccinated at population-level | March, vaccinated at population-level |                |              |                |
| Fully vaccinated calculation     | 0.33                                    | 0.421                                 |                |              |                |
| Calculation with any vaccination | 0.33                                    | 0.421                                 |                |              |                |
|                                  |                                         |                                       |                |              |                |
|                                  | Vaccine efficacy (low)                  | Vaccine efficacy (high)               |                |              |                |
| Fully vaccinated calculation     | 87.8%                                   | 91.7%                                 |                |              |                |
| Calculation with any vaccination | 85.1%                                   | 89.9%                                 |                |              |                |

Supplementary Table S4: Percent of patients hospitalized in (NYS portion of) catchment area who were admitted to our hospital during the study period. Note that our catchment area also extends to small portions of northwestern Pennsylvania which would reduce the proportion of patients admitted to our institution.

|                                       | Ages 0 to 4 | Ages 5 to 11 | Ages 12 to 18 | Total |
|---------------------------------------|-------------|--------------|---------------|-------|
| Hospitalized In Western NY (No.)      | 150         | 50           | 140           | 340   |
| Hospitalized In Our Institution (No.) | 133         | 49           | 80            | 262   |
| Hospitalized In Our Institution (%)   | 89%         | 98%          | 57%           | 77%   |
